# Supplementary material for: Hazard maps with differentiated exceedance probability for floodimpact assessment
Source: Copernicus journal article supplement (doi:10.5194/nhess-2019-158), 2019-05-24
Supplement: Supplementary file 1 [file nhess-2019-158-supplement.pdf]

*Supplement of*

## **Hazard maps with differentiated exceedance probability for flood impact assessment**

5 Punit K. Bhola<sup>1</sup>, Jorge Leandro<sup>1</sup>, Markus Disse<sup>1</sup>

<sup>1</sup>Chair of Hydrology and River Basin Management, Department of Civil, Geo and Environmental Engineering, Technical University of Munich, Arcisstrasse 21 80333 Munich, Germany

*Correspondence to:* Punit K. Bhola (punit.bhola@tum.de)

**Table 1. Parameters of the LARSIM water balance model including initially calibrated ranges (Data source: Based on Haag et al., 2016). Eight sensitive parameters (in bold) identified in Beg et al. (2018) were used in this study to generate discharge ensemble forecasts.**

| Parameter                                 | Unit                  | Description                                                                              | Ranges (L-U)   |
|-------------------------------------------|-----------------------|------------------------------------------------------------------------------------------|----------------|
| <i>External forcing</i>                   |                       |                                                                                          |                |
| KG                                        | [-]                   | Correction factor for the areal precipitation                                            | 0.9 – 1.1      |
| KWD                                       | [-]                   | Correction factor for the available amount of water including snowmelt                   | 0.9 – 1.1      |
| Nkor                                      | [-]                   | Correction factor for rainfall measurements error                                        | 0.9 – 1.1      |
| <i>Snow storage</i>                       |                       |                                                                                          |                |
| T_Gr                                      | [°C]                  | Mean temperature of the transition zone from snowfall to rain                            | -3 – 2         |
| ScRa                                      | [mm/h]                | Soil heat flow as potential melting rate                                                 | 0.01 – 0.05    |
| Abso                                      | [-]                   | Absorption coefficient of the snowpack for short-wave radiation                          | 0.02 – 0.25    |
| A0                                        | [W/m <sup>2</sup> °C] | Heat exchange at the snow line, independent of the wind                                  | 0.5 – 3.5      |
| A1                                        | [J/m <sup>3</sup> °C] | Heat exchange at the snow line, dependent on the wind                                    | 0.8 – 2.5      |
| SRet                                      | [%]                   | Coefficient for the retention of liquid water in the snow pack                           | 5.0 – 47.0     |
| <i>Soil storage and runoff generation</i> |                       |                                                                                          |                |
| <b>A2</b>                                 | [mm/h]                | Threshold value for fast and slow surface runoff                                         | 0.5 – 4.0      |
| <b>BSF</b>                                | [-]                   | Exponent of the soil moisture saturation area function                                   | 0.01 – 0.5     |
| <b>Dmax</b>                               | [-]                   | Calibration factor for lateral drainage to the interflow storage at saturated conditions | 0 – 10         |
| Dmin                                      | [-]                   | Calibration factor for lateral drainage to the interflow storage at field capacity       | 0 – 5          |
| <b>β</b>                                  | [1/d]                 | Drainage index for deep percolation from the lower soil storage                          | 0.000002 – 0.1 |
| WZPf                                      | [-]                   | Threshold value for the lower soil storage as a fraction of the total soil storage       | 0.25 – 0.75    |
| WZBo                                      | [-]                   | Threshold value for the middle soil storage as a fraction of the total soil storage      | 0.35 – 1.05    |
| Mauf                                      | [mm/d]                | Maximum rate of capillary rise                                                           | 0.9 – 1.1      |
| KFeld                                     | [-]                   | Correction factor for the field capacity                                                 | 1.0 – 1.4      |
| <i>Runoff concentration</i>               |                       |                                                                                          |                |
| <b>EQD2</b>                               | [-]                   | Calibration variable for the retention constant of the fast surface runoff storage       | 10 – 1000      |
| <b>EQD</b>                                | [-]                   | Calibration variable for the retention constant of the slow runoff storage               | 50 – 5000      |
| <b>EQI</b>                                | [-]                   | Calibration variable for the retaining constant of the interflow storage                 | 200 – 15000    |
| <b>EQB</b>                                | [-]                   | Gauging size for the retaining constant of the basis discharge storage                   | 5000 – 100000  |
| <i>Flood routing</i>                      |                       |                                                                                          |                |
| EKM                                       | [-]                   | Calibration factor for the roughness coefficient in the main river bed                   | 0.3 – 3.0      |
| EKL / EKR                                 | [-]                   | Calibration factors for the roughness coefficients on the flood plains                   | 0.3 – 3.0      |

**Table 2. 2D hydrodynamic model properties and roughness. Data source: Bhola et al (2018a) and Bhola et al. (2018b).**

| <b>Data</b>                                     | <b>Value</b>         |
|-------------------------------------------------|----------------------|
| <i>HD model properties</i>                      |                      |
| Model area                                      | 11.5 km <sup>2</sup> |
| Total number of cells                           | 430,485              |
| $\Delta t$                                      | 20 s                 |
| Minimum cell area                               | 6.8 m <sup>2</sup>   |
| Maximum cell area                               | 59.8 m <sup>2</sup>  |
| Average cell area                               | 24.8 m <sup>2</sup>  |
| Downstream boundary condition slope             | 0.0096               |
| <i>HD model roughness [s/m<sup>(1/3)</sup>]</i> |                      |
| Water bodies                                    | 0.022                |
| Agriculture                                     | 0.043                |
| Forest                                          | 0.189                |
| Transportation                                  | 0.014                |
| Urban                                           | 0.074                |
